# Supplementary material
Source: PubMed Central journal article supplement (PMC5001568)
Supplement: NIHMS806691-supplement-Supplemental_Table_2.pdf [file NIHMS806691-supplement-Supplemental_Table_2.pdf]

**SUPPLEMENTAL TABLE 2**

**FDA-APPROVED THERAPEUTICS FOR CANCER RISK REDUCTION OR TREATMENT OF PRECANCEROUS CONDITIONS\***

| <b>CANCER RISK REDUCTION</b>                                             |                                                                                     |                   |
|--------------------------------------------------------------------------|-------------------------------------------------------------------------------------|-------------------|
| <b>Condition</b>                                                         | <b>Generic Name</b>                                                                 | <b>Trade Name</b> |
| Breast cancer                                                            | raloxifene                                                                          | Evista            |
|                                                                          | tamoxifen                                                                           | Nolvadex          |
| Cervical, vulvar, vaginal, and anal cancers and dysplasia, genital warts | Human Papillomavirus Quadrivalent Vaccine (Types 6, 11, 16, and 18)                 | Gardasil          |
| Cervical, vulvar, vaginal, and anal cancers and dysplasia, genital warts | Human Papillomavirus 9-valent Vaccine (Types 6, 11, 16, 18, 31, 33, 45, 52, and 58) | Gardasil 9        |
| Cervical cancer and cervical dysplasia                                   | Human Papillomavirus Bivalent Vaccine (Types 16 and 18)                             | Cervarix          |
| <b>TREATMENT OF PRECANCEROUS CONDITIONS</b>                              |                                                                                     |                   |
| <b>Condition</b>                                                         | <b>Generic Name</b>                                                                 | <b>Trade Name</b> |
| Actinic keratosis                                                        | Ingenol mebutate                                                                    | Picato            |
|                                                                          | fluorouracil                                                                        | Adricil           |
|                                                                          | diclofenac sodium                                                                   | Voltaren          |
|                                                                          | 5-aminolevulinic acid + photodynamic therapy (PDT)                                  |                   |
|                                                                          | Masoprocol/nordihydroguaiaretic acid                                                | Actinex           |
| Bladder dysplasia                                                        | bacillus calmet guerin/BCG                                                          |                   |
|                                                                          | Valrubicin                                                                          | Valstar           |
| Esophageal dysplasia                                                     | porfimer sodium + photodynamic therapy (PDT)                                        | Photofrin         |

\*Adapted from Wu X, Patterson S, Hawk E. Chemoprevention - History and general principles. Best Practice Research Clinical Gastroenterology. 2011;25:445-59.
