# Supplementary material
Source: PubMed Central journal article supplement (PMC5001568)
Supplement: NIHMS806691-supplement-Supplemental_Table_3.pdf [file NIHMS806691-supplement-Supplemental_Table_3.pdf]

**SUPPLEMENTAL TABLE 3**

**SURGICAL AND RADIOTHERAPY TREATMENTS FOR CANCER**

| SURGICAL TREATMENTS                                                                           |                                                                                               |
|-----------------------------------------------------------------------------------------------|-----------------------------------------------------------------------------------------------|
| Used to Treat                                                                                 | Procedure                                                                                     |
| breast cancer                                                                                 | Mastectomy                                                                                    |
| breast cancer                                                                                 | Lumpectomy                                                                                    |
| testicular cancer                                                                             | Orchiectomy                                                                                   |
| multiple head, neck, and chest cancers                                                        | Video-assisted thoroscopic surgery (VATS)                                                     |
| variety of abdominal cancers                                                                  | Laparoscopic surgery                                                                          |
| sarcoma and other cancers                                                                     | Reconstructive and limb-sparing surgeries                                                     |
| kidney cancer                                                                                 | Partial nephrectomy                                                                           |
| pancreatic cancer                                                                             | The Whipple/modified Whipple procedure                                                        |
| stomach-sparing pancreatic surgery for pancreatic cancer                                      | Pancreatoduodenectomy                                                                         |
| rectal cancer                                                                                 | Total mesorectal excision                                                                     |
| prostate cancer                                                                               | Nerve-sparing prostatectomy                                                                   |
| rectal cancer                                                                                 | Transanal endoscopic microsurgery (TEM)                                                       |
| testicular cancer                                                                             | Modified retroperitoneal lymph node dissection                                                |
| breast, melanoma, and colorectal cancer                                                       | Sentinel lymph node biopsies                                                                  |
| breast cancer, laryngeal cancer, and anal/rectal cancer                                       | Neoadjuvant chemotherapy                                                                      |
| multiple cancers                                                                              | Robotic or computer-assisted surgeries                                                        |
| RADIOTHERAPY TREATMENTS                                                                       |                                                                                               |
| Used to Treat                                                                                 | Procedure                                                                                     |
| prostate, cervical, and other cancers                                                         | Brachytherapy                                                                                 |
| multiple cancers                                                                              | Image-guided radiation therapy (IGRT)                                                         |
| multiple cancers                                                                              | Intensity modulated radiation therapy (IMRT)                                                  |
| brain metastases                                                                              | Stereotactic radiosurgery                                                                     |
| liver and lung cancers                                                                        | Stereotactic body radiation therapy                                                           |
| multiple cancers                                                                              | Neoadjuvant and adjuvant radiotherapy combined with radiation therapy                         |
| head and neck cancers                                                                         | Radiation therapy combined with molecularly targeted therapy (cetuximab)                      |
| prostate cancer                                                                               | Radiation therapy combined with androgen deprivation                                          |
| prostate cancer                                                                               | Adjuvant radiotherapy                                                                         |
| pediatric cancers                                                                             | Proton therapy                                                                                |
| inoperable glioblastoma, lung cancer, head and neck cancer, esophagus cancer, pancreas cancer | Concurrent chemotherapy and radiation therapy                                                 |
| anal cancer, head and neck cancer                                                             | Radiation with chemotherapy can produce cure with organ preservation                          |
| breast cancer                                                                                 | Radiation and surgery (with or without chemotherapy) can produce cure with organ preservation |
